# Supplementary material for: Real-time monitoring of E. coli O157 and Salmonella enterica serovar Typhimurium in water using ultrasound and latex-based immunoassay
Source: Royal Society of Chemistry journal article supplement (doi:10.1039/c3ay41135d), 2013-11-21
Supplement: c3ay41135d.pdf [file c3ay41135d.pdf]

# Supporting information

## **Real-time Monitoring of *E. coli* O157 and *Salmonella* *enterica* serovar Typhimurium in Water Using Ultrasound and Latex-based Immunoassay**

*Danny Bavli, Noam Emanuel, and Yechezkel Barenholz\**

Laboratory of Liposome and Membrane Research, Department of Biochemistry,  
Hebrew University-Hadassah Medical School, Jerusalem 91120, Israel

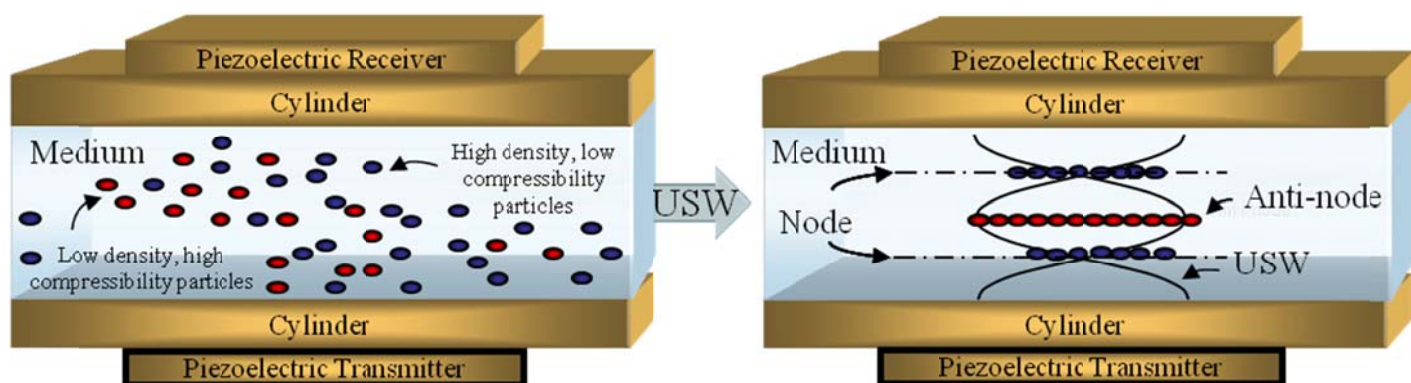

**Fig. S-1.** Schematic showing particles moving to node or anti-node of USW resonator based on their density and compressibility
